# Supplementary material for: Long non-coding RNA MIDEAS-AS1 inhibits growth and metastasis of triple-negative breast cancer via transcriptionally activating NCALD
Source: Springer Nature journal article supplement (doi:10.1186/s13058-023-01709-1), 2023-09-28

## Supplemental Information

### Supplementary Figures

**Fig.S1 MIDEAS-AS1 is lowly expressed in TNBC.** (A) Heat map shows the significantly expressed lncRNAs in breast cancer samples compared to normal tissues according to The Cancer Genome Atlas (TCGA) database. The red shades represent high expression, and blue shades represent low expression. (B) Schematic view of the chromosomal location of MIDEAS-AS1. (C) The protein-coding ability of MIDEAS-AS1 is predicted by CPC2 (<http://cpc2.gao-lab.org>). (D) The expression level of MIDEAS-AS1 in different subtypes of breast cancer tissues by using GSE21653 database. Statistical analysis was performed with the R language. Data were shown as mean  $\pm$  SD. (\* $p < 0.05$ , \*\* $p < 0.01$ , \*\*\* $p < 0.001$ ).

**Fig.S2 Knock down of MIDEAS-AS1 contributes to TNBC cell proliferation and migration in vitro.** (A-B) The efficiency of MIDEAS-AS1 overexpression (A) and knockdown (B) were examined by qRT-PCR. (C) Flow cytometry was performed to measure the effect of MIDEAS-AS1 overexpression and knockdown on cell cycle in vitro. (D) Wound-healing assays were used to evaluate the motility of MDA-MB-231 and MDA-MB-468 cells transfected with MIDEAS-AS1-overexpressing vector or control vector and si-NC or si-MIDEAS-AS1. Data were shown as mean  $\pm$  SD. (\* $p < 0.05$ , \*\* $p < 0.01$ , \*\*\* $p < 0.001$ ).

**Fig.S3 Effect of overexpression or knockdown of MIDEAS-AS1 on MATR3.** (A)

Interaction sites of MIDEAS-AS1 and MATR3 genes were analyzed from the catRAPID database. (B) The influence of knockdown or overexpression MIDEAS-AS1 on the expression level of MATR3 in MDA-MB-231 and MDA-MB-468 cells was determined by qRT-PCR and western blot analysis.

**Fig.S4 NCALD is downregulated in breast cancer tissues.** (A) qRT-PCR analysis was used to verify the relative expression of 9 candidate genes in MDA-MB-231 and MDA-MB-468 cells with knockdown or overexpression MIDEAS-AS1. (B) Effect of overexpression and knockdown of MIDEAS-AS1 on expression of its sense gene (MIDEAS) by qRT-PCR assay in MDA-MB-231 and MDA-MB-468 cells. (C) Relative expression of NCALD in tumor tissue and adjacent normal breast tissues from TCGA data. (D) Relative expression of NCALD in tumor tissue and adjacent normal breast tissues from a BCIP cohort. (E) Expression of NCALD in tumor and normal breast tissues detected by IHC from Human Protein Atlas (<https://www.proteinatlas.org/>). (F) The efficiency of knockdown and overexpression of MATR3 was confirmed by qRT-PCR and Western blot in MDA-MB-231 and MDA-MB-468 cells. Data were shown as mean  $\pm$  SD. (\* $p < 0.05$ , \*\* $p < 0.01$ , \*\*\* $p < 0.001$ ).

**Fig.S5 Knock down of NCALD promotes TNBC cell proliferation and migration in vitro.** (A) Flow cytometry was performed to measure the effect of NCALD overexpression and knockdown on cell cycle in vitro. (B) Wound-healing assays were

used to evaluate the motility of MDA-MB-231 and MDA-MB-468 cells transfected with NCALD-overexpressing vector or control vector and si-NC or si-NCALD. Data were shown as mean  $\pm$  SD. (\* $p$ <0.05, \*\* $p$ <0.01, \*\*\* $p$ <0.001).

## Supplementary Tables

**Table S1. si-RNA and plasmids used for transfection.**

| <b>Name</b>                  | <b>Sequence (5'-3')</b>                                                    |
|------------------------------|----------------------------------------------------------------------------|
| MIDEAS-AS1                   | F CGGAATCCCCCTCGGCTGCGGGGTAG<br>R CGGGATCCTGCCAAAATGAACACTACTGTCATG        |
| MIDEAS-AS1(for organoid)     | F GCTCTAGACCCTCGGCTGCGGGGTAG<br>R CGGGATCCTGCCAAAATGAACACTACTGTCATG        |
| NCLAD                        | F CCCTCGAGATGGGGAAACAGAACAGCAAGCT<br>R GCTCTAGATCAGAACTGGCCGGCACTGCTC      |
| MATR3                        | F CGCAAATGGGCGGTAGGCGTG<br>R CCTCTACAAATGTGGTATGGC                         |
| NCALD-Luc1                   | F GGGGTACCCTGGTTTGGGAAAAGGTATGGC<br>R CCCTCGAGTTCCTTCTTTCCCAACCCC          |
| NCALD-Luc2                   | F GGGGTACCTGAGTGCTAATAGGTGTGGGAT<br>R CCCTCGAGTTCACGTTTAATGTGAACTCTTC      |
| NCALD-Luc3                   | F GGGGTACCCTTCTGGCTTCTCTTGGGGGCA<br>R CCCTCGAGAGAGAATCTAATCTAATTGTTA       |
| NCALD-Luc4                   | F GGGGTACCCGGGGTCGGGCCTAGTATTAAG<br>R CCCTCGAGGCCTTCCTCGTTGTAATGTTTGC      |
| NCALD-Luc5                   | F GGGGTACCCAGGTCACGGTGCCTTTGCAGCCT<br>R CCCTCGAGTGCTTTTGTCTAACTAGTGCTTTC   |
| NCALD-all length (Luc)       | F GGGGTACCCTGGTTTGGGAAAAGGTATGGCA<br>R CCCTCGAGTGCTTTTGTCTAACTAGTGCTTTC    |
| MIDEAS-AS1-Sense             | F TAATACGACTCACTTACATAGGGCCCTCGGCTGCGGGGTAG<br>R TGCCAAAATGAACACTACTGTCATG |
| MIDEAS-AS1-Antisense         | F TAATACGACTCACTTACATAGGGTGCCAAAATGAACACTACTGTCATG<br>R CCCTCGGCTGCGGGGTAG |
| MIDEAS-AS1- $\Delta$ 1-sense | F1 TAATACGACTCACTATAGGGCCTGCCAATGATCTCTGCCTCCA                             |
| MIDEAS-AS1- $\Delta$ 2       | R2 AGTTCTCAATGTTGCCTCATGGGCGCATCTTAGAGGCTGT                                |
| MIDEAS-AS1- $\Delta$ 2-sense | F2 ACAGCCTCTAAGATGCGCCCATGAGGCAACATTGAGAA                                  |
| MIDEAS-AS1- $\Delta$ 3       | R3 TGCTGTGCTGCCAGCAGCCAGCTCA                                               |
| si-MIDEAS-AS1                | Sense CCAUUUCUCCACUUUGGAATT<br>Antisense UCCAAAGUGGAGAAAUGGTT              |
| si-MATR3                     | Sense GCCAGUGAGAGUUUCAUUUATT<br>Antisense UAAAUGAACUCUCACUGGCTT            |
| si-NCALD                     | Sense UUCUCCGAACGUGUCACGUTT<br>Antisense ACGUGACACGUUCGGAGAA               |
| si-NC                        | Sense UUCUCCGAACGUGUCACGUTT<br>Antisense ACGUGACACGUUCGGAGAATT             |

**Table S2. Primers used for qRT-PCR.**

| <b>Name</b> | <b>Sequence (5'-3')</b>                                    |
|-------------|------------------------------------------------------------|
| MIDEAS-AS1  | F TTCCCATCCCAGAAGATAAAG<br>R TTGCCTCATTGCTGTGCTG           |
| U6          | F CTCGCTTCGGCAGCACAA<br>R AACGCTTCACGAATTTGCGT             |
| GAPDH       | F GTCTCCTCTGACTTCAACAGCG<br>R ACCACCCTGTTGCTGTAGCCAA       |
| MATR3       | F CAGCAGTCTACAAATCCAGCACC<br>R CTGCATGTGTCTAGGTCCTTGC      |
| NCALD       | F TCATCATCGCCTTGAGTGT<br>R TTGACTCATCTTCAGGCATT            |
| HBB         | F AGGAGAAGTCTGCCGTTACTG<br>R CCGAGCACTTTCTTGCCATGA         |
| ADHFE1      | F TGGACTTTCACCTTCTGGGAA<br>R GGAGAGGTTCTTGTCTGTCATCA       |
| MAPK10      | F CAGATGGAATTAGACCATGAGCG<br>R TCAATGTGCAATCAGACTTGACT     |
| EDAR        | F CGAGCGGAATACTCAAAGTGGC<br>R TAGTCCTCGTCTTTGGTGCCGT       |
| AF131215.5  | F AGCCAGGGGAACAAGGTAAAAG<br>R ATCTGATCACCTTACCACCTCCA      |
| CXCL1       | F AGCTTGCTCAATCCTGCATCC<br>R TCCTTCAGGAACAGCCACCAGT        |
| DAPL1       | F AGAAATTGGCACCTTGGAAGACA<br>R GCTTCTCCAGTGCGTCATTGAG      |
| ARHGAP40    | F AGCCTTCAACATGGACTCTGC<br>R TTTGGGGACGGTAAACTTCGG         |
| NCALD-P1    | F CTGGTTTGGGAAAAGGTATGG<br>R TATCCATTTATCAGTTGACAGACA      |
| NCALD-P2    | F TGACATCGTTTGTTCATAAAGAG<br>R CCAACTTCCAGTGACCACTTATC     |
| NCALD-P3    | F TGGGGAAAGAAGGGAATGA<br>R GTGATTTTTCTTTAATGATCTCTAC       |
| NCALD-P4    | F CAATAAAGAAAAGTAGATAAAGTGG<br>R TTCACGTTTAATGTGAACTCTTCTA |
| NCALD-P5    | F TCTGGCTTCTCTTGGGGGCAG<br>R GACAAACTGAGAAGGGCACAA         |
| NCALD-P6    | F CTTTATCCTTCAGGGACATTTG<br>R CAGGGGTGTCCAGCTTTGTA         |
| NCALD-P7    | F TTAGATTAGATTCTCTCGGGGTCGG<br>R TTAGCAGGTTAGCCCAGCAT      |
| NCALD-P8    | F TGATGGTTTAAACAGCCTCCTAGA                                 |

|           |                             |
|-----------|-----------------------------|
|           | R GCCTTCCTCGTTGTAATGTTTG    |
| NCALD-P9  | F TGCCTTTGCAGCCTTGTTA       |
|           | R CCAGCACCTGTTTCCTGTCTT     |
| NCALD-P10 | F ATTGGGTGAATGAATTGACAAGA   |
|           | R GGCTGCTTTTGTCTAACTAGTGCTT |
| MIDEAS    | F AGCGGAAAAGTGTATTGGCCT     |
|           | R GCTCAGCAGGGTTCTGTTCA      |
| Actin     | F CATGTACGTTGCTATCCAGGC     |
|           | R CTCCTTAATGTCACGCACGAT     |

---

**Figure S1**

**A**

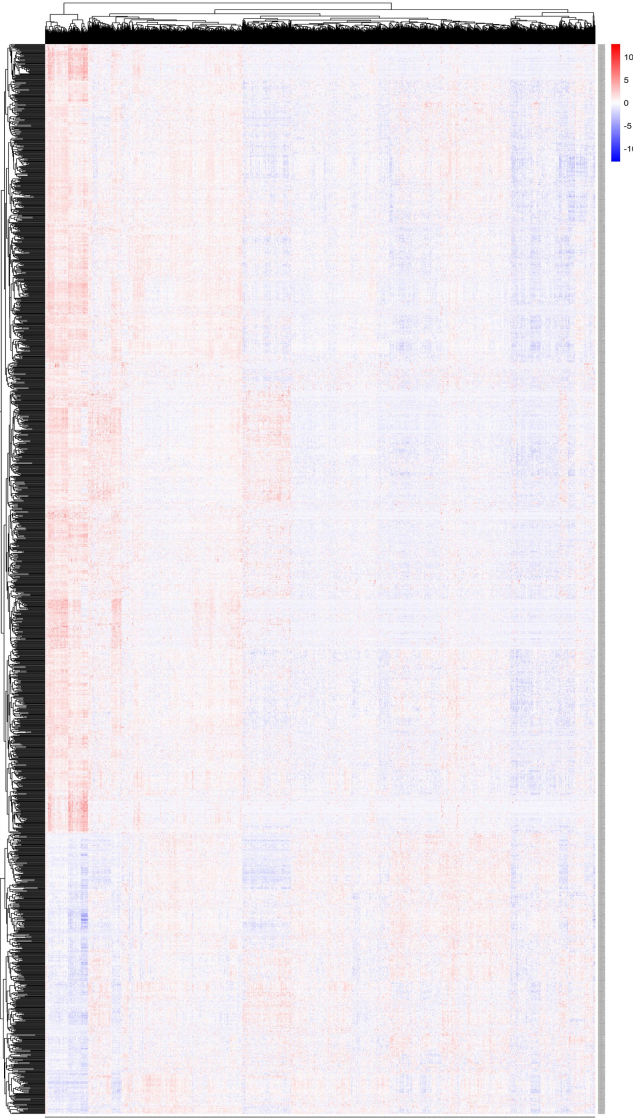

**B**

Chromosome14:73,787,360-73,803,300 (hg38)

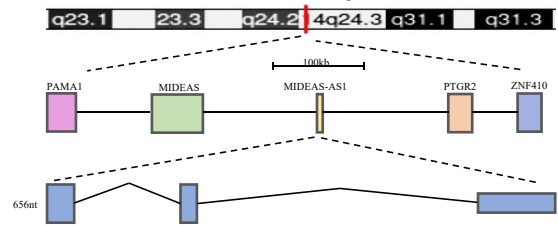

**C**

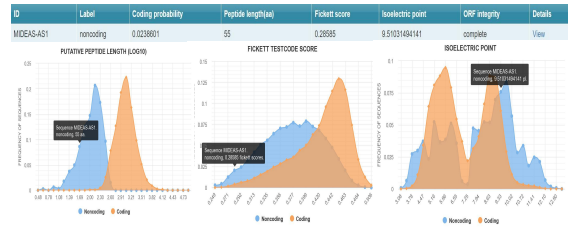

**D**

$$F_{\text{Welch}}(3, 79, 19) = 8.03, p = 9.72e-05, \hat{\alpha}_p^2 = 0.20, CI_{95\%} [0.07, 1.00], n_{\text{obs}} = 226$$

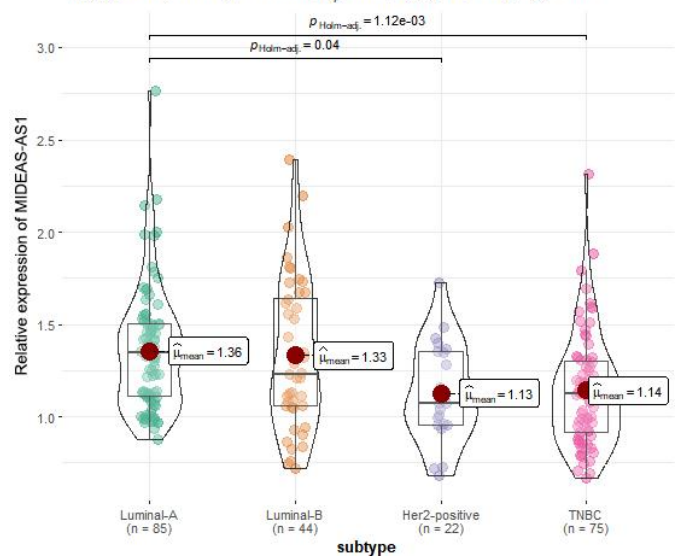

**Figure S2**

**A**

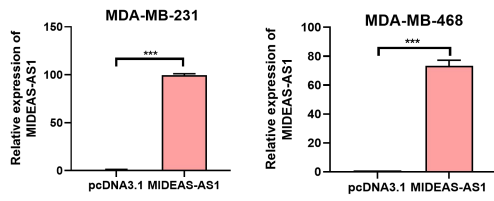

**B**

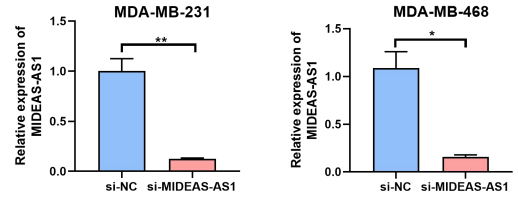

**C**

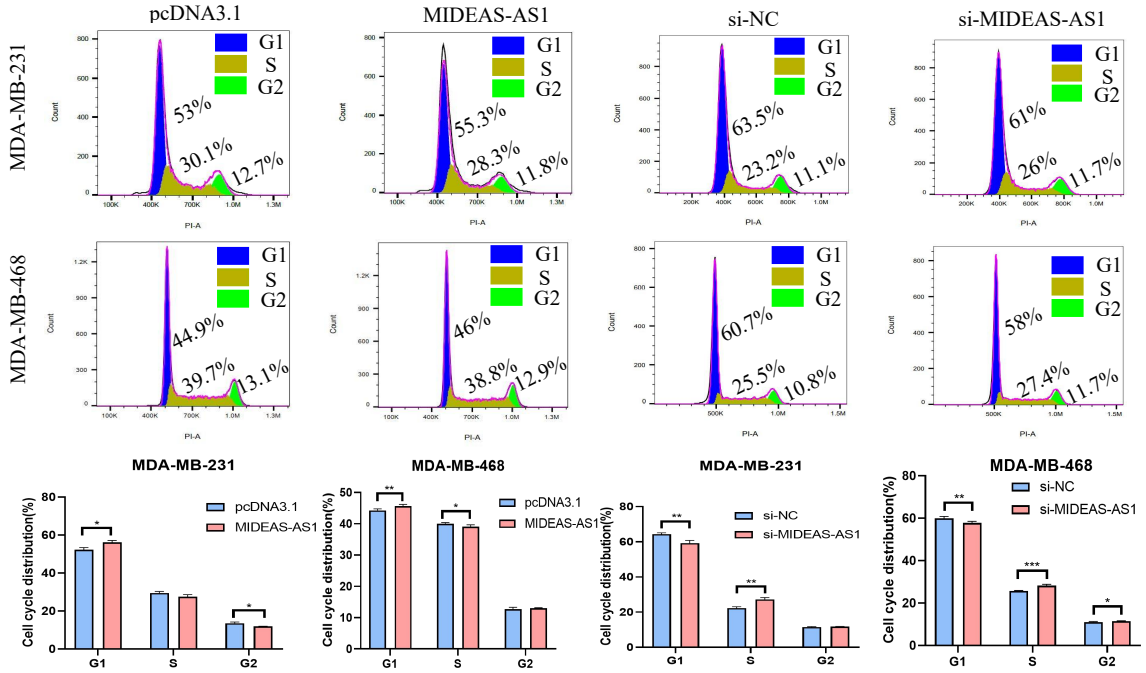

**D**

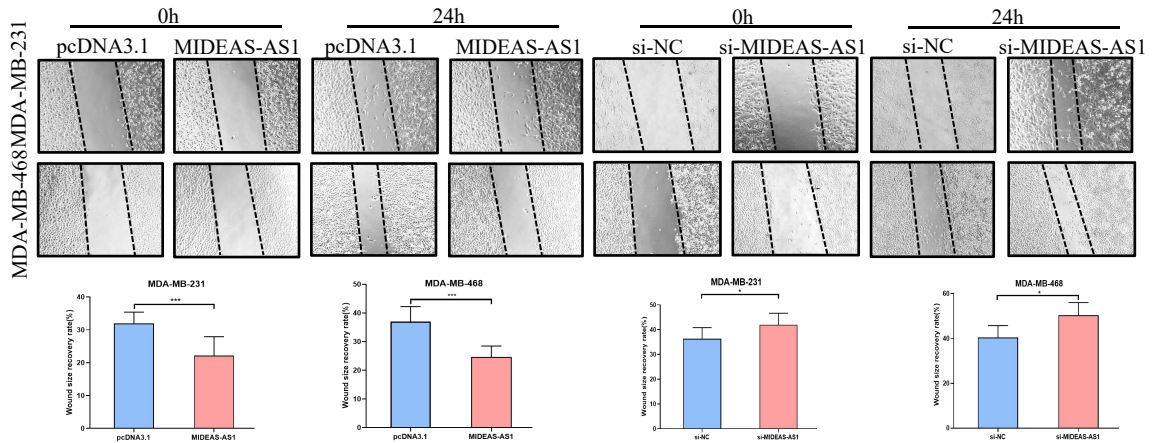



**Figure S3**

**A**

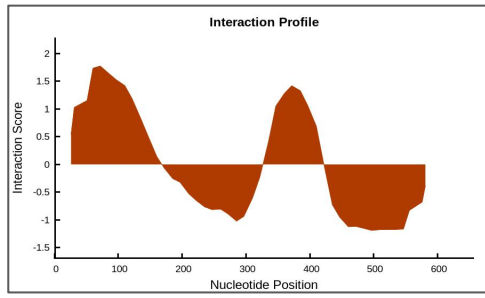

**B**

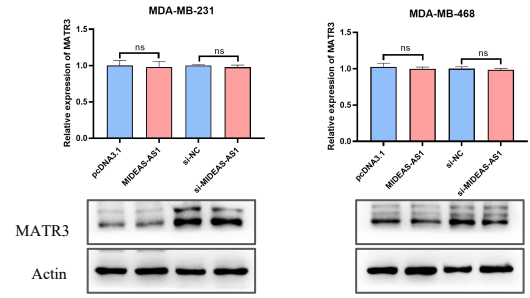

# Figure S4

A

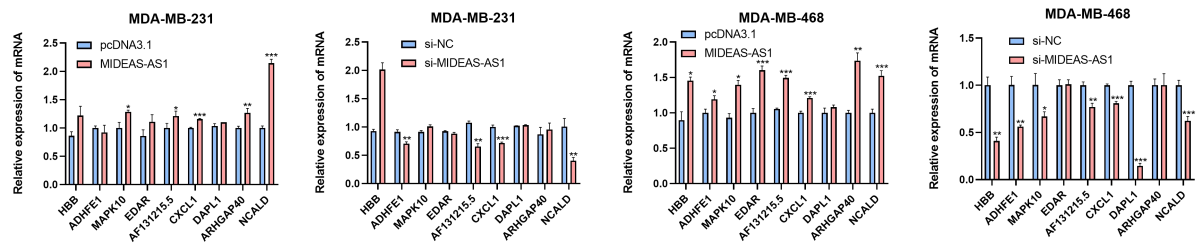

B

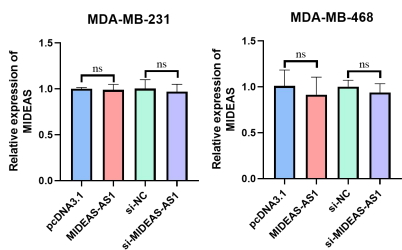

C

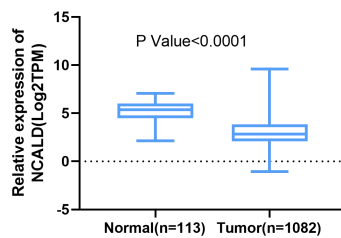

D

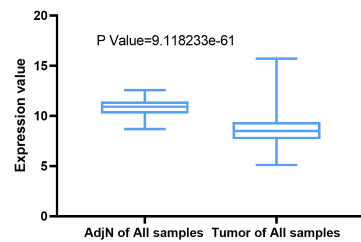

E

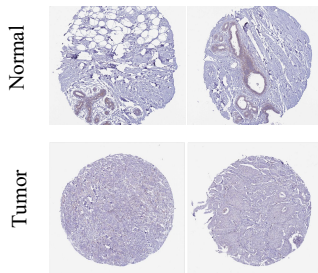

F

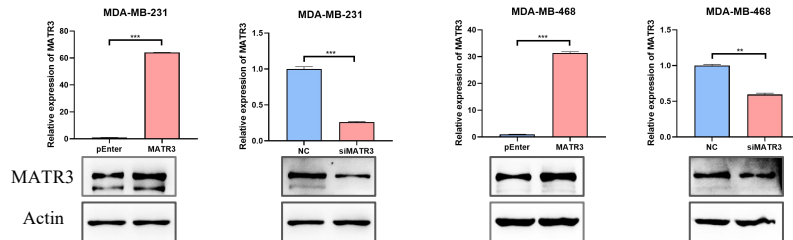

**Figure S5**

**A**

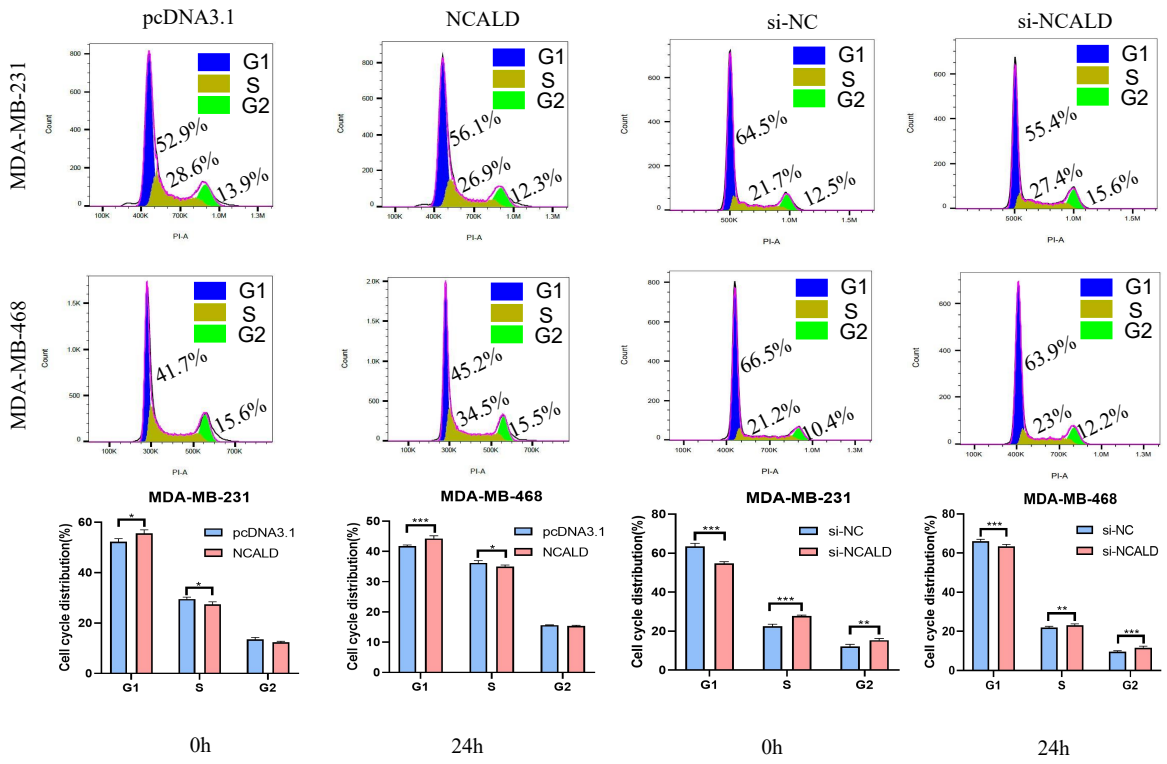

**B**

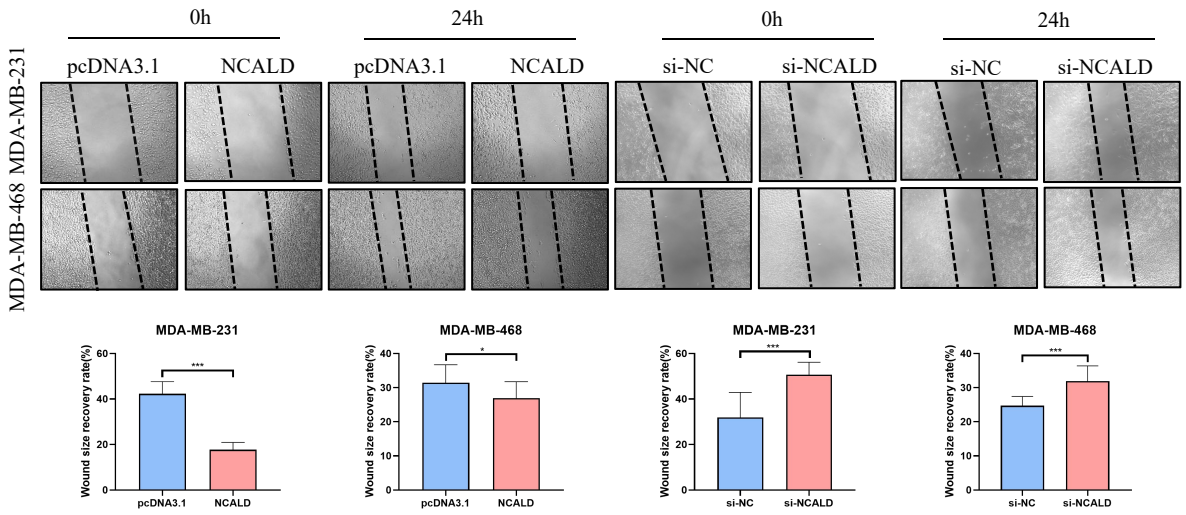

Supplement: MOESM1 [file 26100602]
